# Supplementary material
Source: PubMed Central journal article supplement (PMC2665887)
Supplement: ja8085643_si_001.pdf [file ja8085643_si_001.pdf]

# Characterizing Loop Dynamics and Ligand Recognition in Human- and Avian-type Influenza Neuraminidases via Generalized Born Molecular Dynamics and End-point Free Energy Calculations

Rommie E. Amaro, Xiaolin Cheng, Ivaylo Ivanov, Dong Xu, and J. Andrew McCammon

## Supporting Information

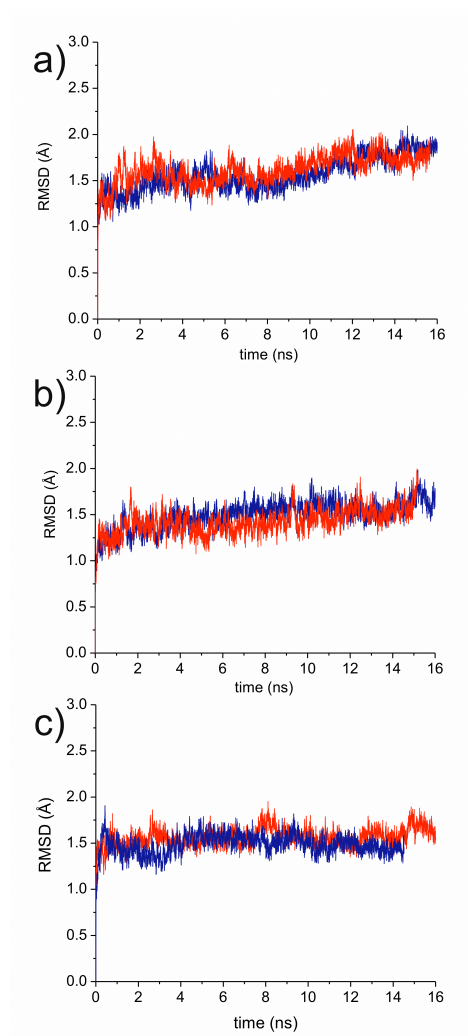

**Figure S1: Overall RMSD for all backbone atoms.** Overall root-mean-square deviations of the backbone atoms for the N1-closed (a), the N9-closed (b) and the N1-open (c) systems. Blue lines correspond to the apo simulations while red lines correspond to the oseltamivir-bound systems.

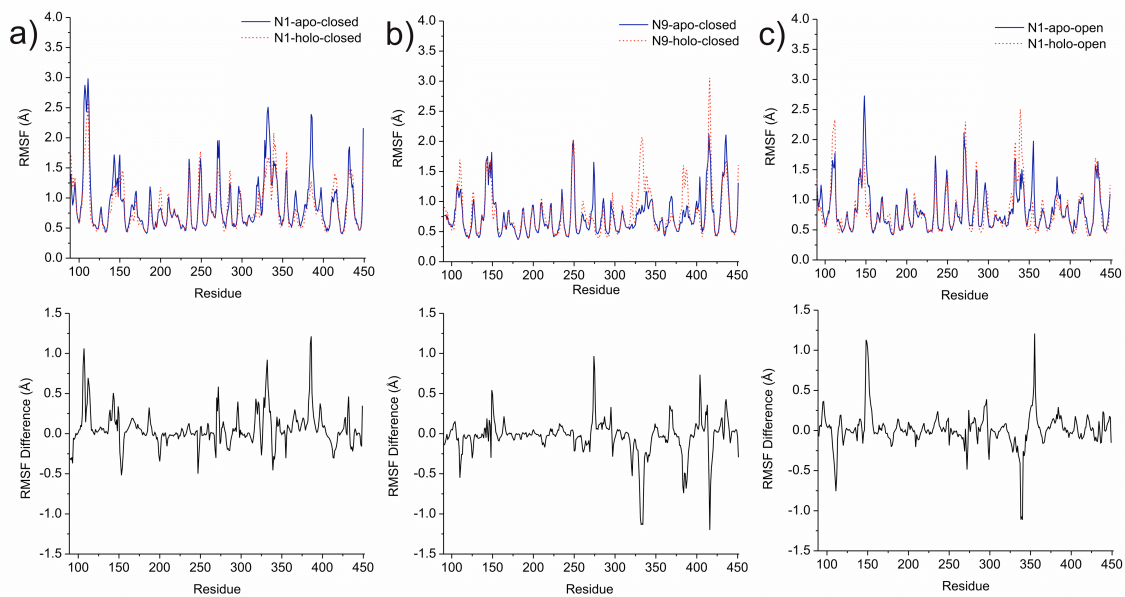

**Figure S2: Root-mean-square fluctuation (RMSF) analysis.** RMSFs per residue (top panels) for the N1-closed (a), the N9-closed (b) and the N1-open (c) systems are shown with solid blue lines representing the apo simulations and dotted red lines representing the oseltamivir-bound systems. The bottom panels represent the corresponding RMSF Differences for the three systems (apo subtracted from holo).

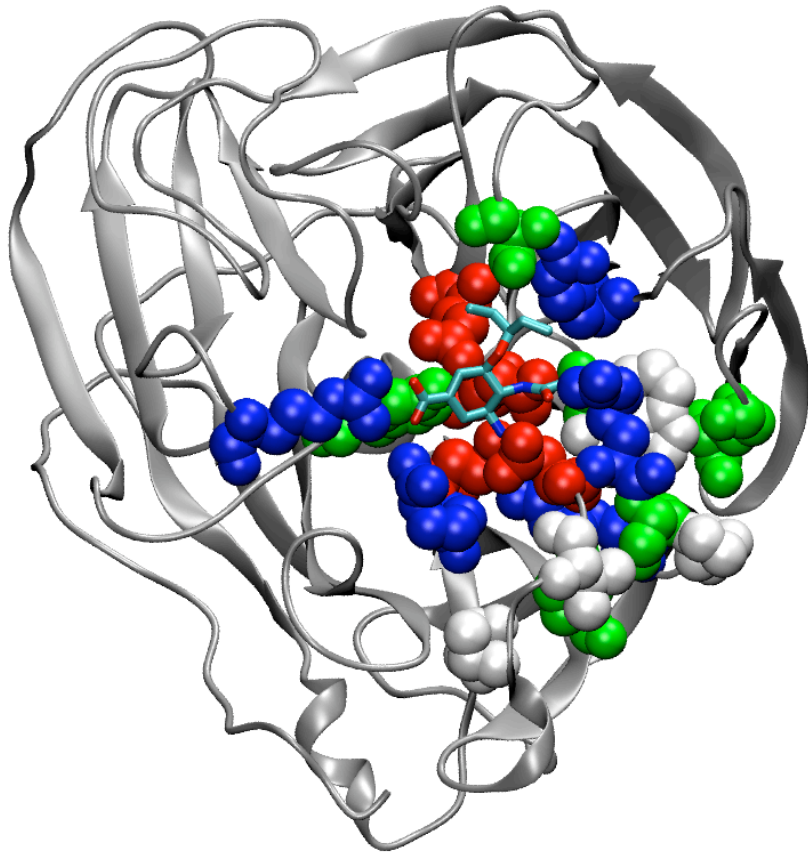

**Figure S3: N1 Sialic acid and 150-loop hot spot residues.** The hot spot residues in the sialic acid region (residues 118, 119, 224, 227, 246, 277, 371, 406) and 150-loop region (residues 116, 136, 149, 151, 152, 153, 154, 156, 178, 179, 195, 196) of N1 are shown in space filling and colored by residue type (green: polar, white: hydrophobic, red: acidic, blue: basic). The N1 backbone is shown in grey cartoon and oseltamivir is shown in licorice (carbons: cyan, oxygens: red, nitrogens: navy blue; for clarity no hydrogens are displayed).

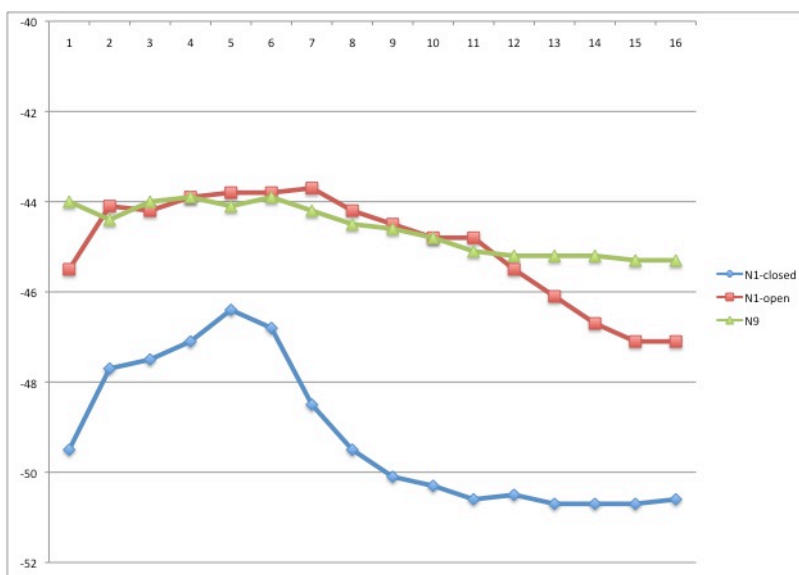

**Figure S4: Convergence of the MM-GBSA Calculations.** The MM-GBSA binding free energies for the N1-closed (blue square), N1-open (red circle), and N9 (green triangle) systems are shown as a function of simulation length in 1 ns increments. Energies are plotted in kcal/mol.

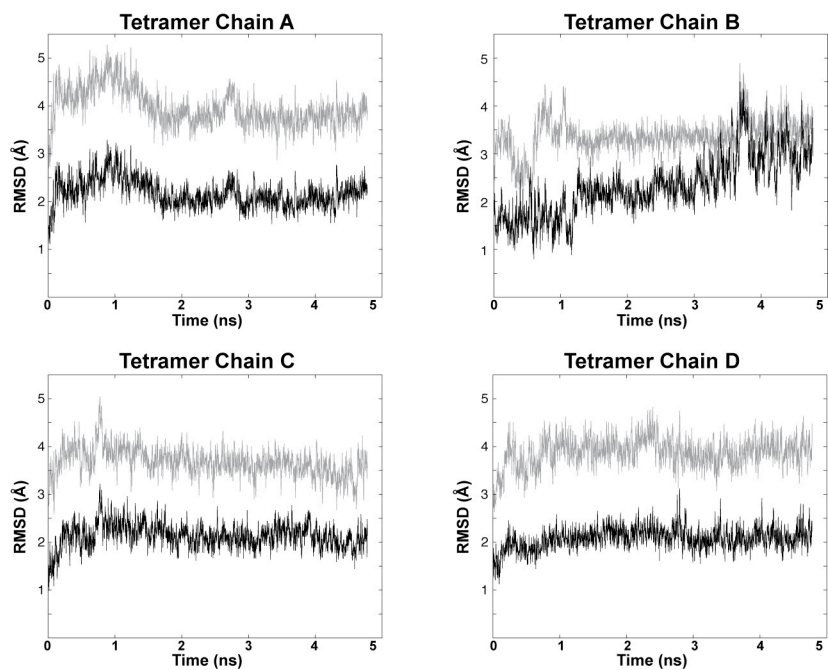

**Figure S5: Tetramer Open/Close Loop Transitions.** Root-mean-square deviation (RMSD) of the 150-loop (comprising residues N146-R152) from the MD with respect to the open (grey) and closed (black) crystal structures are shown for the N1-oseltamivir-bound-closed tetramer simulations.

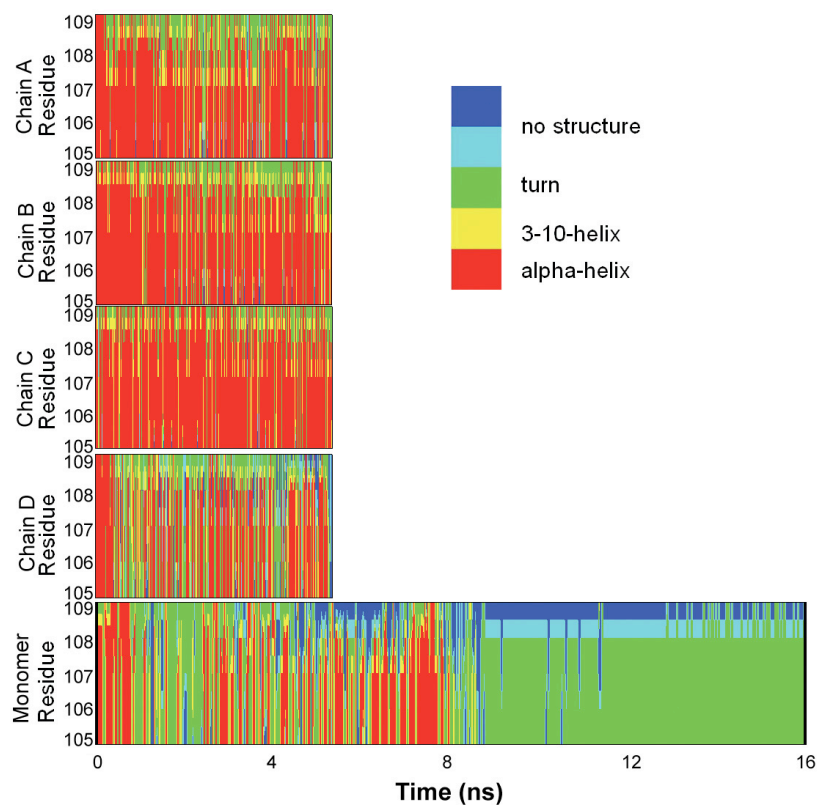

**Figure S6: Secondary Structure Character of the 110-Helix.** Secondary structure characterization of the core of the 110-helix (residues 105 to 109), shown as a function of time. The four chains extracted from the tetramer simulation are shown in the top four panels and the 16 ns monomer simulation is shown on the bottom.

**Complete reference 9:**

9) Itzstein, M. v.; Wu, W.-Y.; Kok, G. B.; Pegg, M. S.; Dyason, J. C.; Jin, B.; Phan, T. V.; Smythe, M. L.; White, H. F.; Oliver, S. W.; Colman, P. M.; Varghese, J. N.; Ryan, D. M.; Woods, J. M.; Bethell, R. C.; Hotham, V. J.; Cameron, J. M.; Penn, C. R. *Nature* **1993**, 363, 418-423.
